# Supplementary material
Source: PubMed Central journal article supplement (PMC6190706)
Supplement: NIHMS988701-supplement-SuppFig.pdf [file NIHMS988701-supplement-SuppFig.pdf]

## **Supplementary Information**

**Fluorescent Ca<sup>2+</sup> indicators inhibit the Na,K-ATPase and disrupt energy metabolism and intracellular Ca<sup>2+</sup> homeostasis**

**Nathan A. Smith<sup>1,2</sup>, Benjamin T. Kress<sup>1</sup>, Yuan Lu<sup>1</sup>, Devin Chandler-Militello<sup>1</sup>, Abdellatif Benraiss<sup>1</sup>, and Maiken Nedergaard<sup>1</sup>**

<sup>1</sup>Center for Translational Neuromedicine, Departments of Neurosurgery and Neurology, University of Rochester Medical Center, Rochester 14642, USA. <sup>2</sup>Center for Neuroscience Research, Children's Research Institute, Children's National Health System, Washington DC 20010, USA.

**Number of Supplementary Figure and movies:** 6 supplementary figures and 5 supplementary movies

## Supplementary Fig. 1

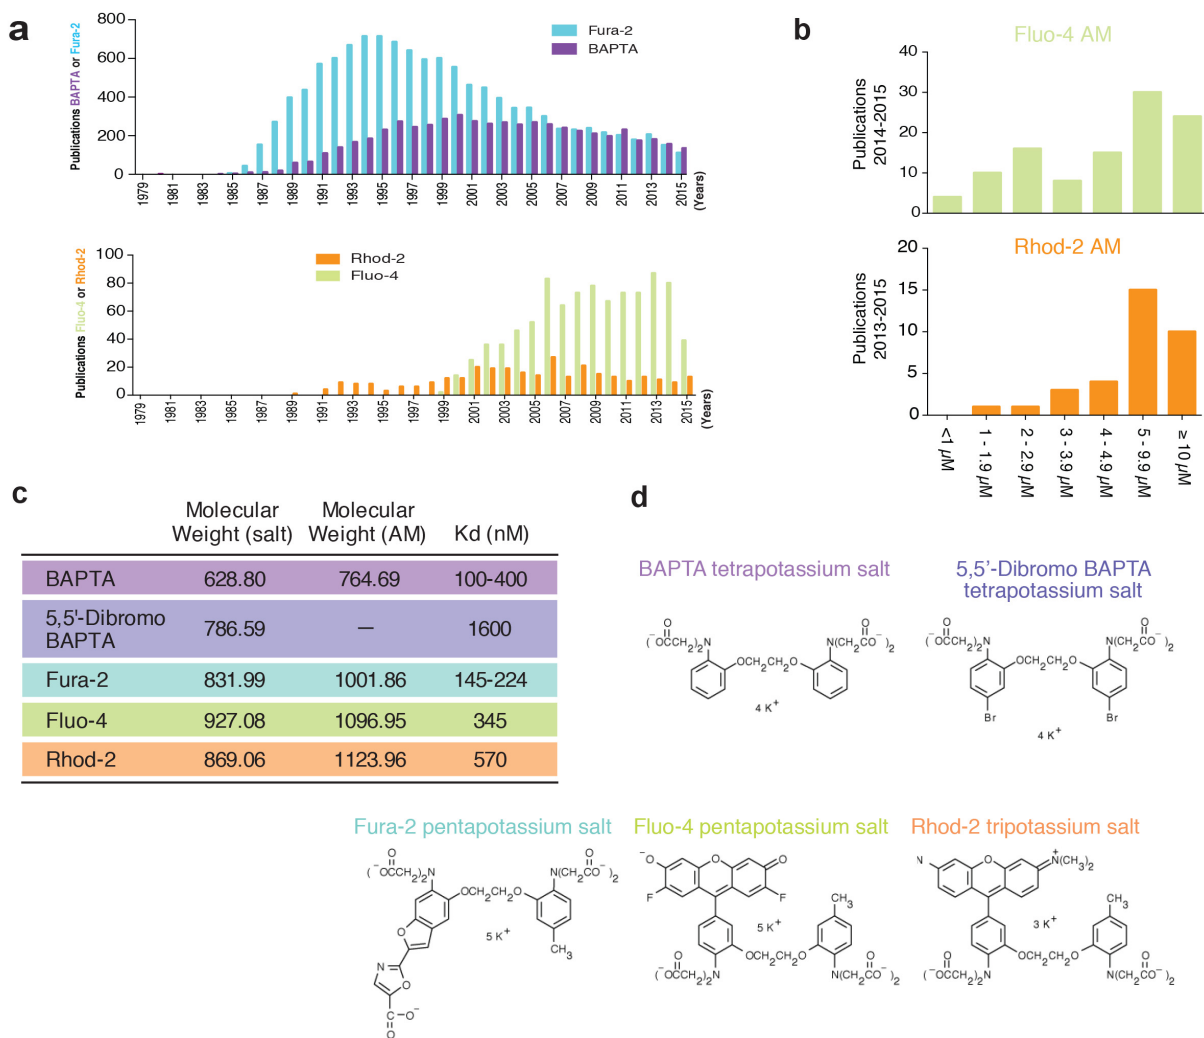

## Supplementary Fig.1. Structures and characters of Ca<sup>2+</sup> indicator derivatives used for published papers listed in PubMed

(a) The numbers of publications using BAPTA, Fura-2, Fluo-4 or Rhod-2 since 1980. (b) Concentrations of Ca<sup>2+</sup> indicators dyes used in the papers published in 2014-2015 (Fluo-4 AM) and 2013-2015 (Rhod-2 AM). (c) Comparison of molecular weight and Ca<sup>2+</sup> affinity of Ca<sup>2+</sup> indicator derivatives. (d) Structures of Ca<sup>2+</sup> indicator dyes. See also Supplementary Note 1.

**Supplementary Fig. 2**

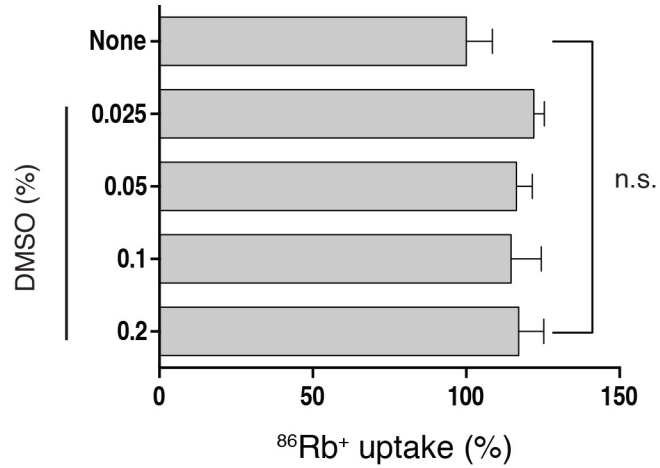

**Supplementary Fig.2. Dimethyl sulfoxide has no effect on  $^{86}\text{Rb}^+$  uptake by astrocytes**

Varying concentrations of dimethyl sulfoxide (DMSO, 0-0.2%) were loaded and  $^{86}\text{Rb}^+$  uptake was assessed in cultured mouse astrocytes. Application of DMSO did not significantly alter astrocyte  $^{86}\text{Rb}^+$  uptake (n=5-6 wells, p=0.35, one-way ANOVA followed by Tukey-Kramer test). Displayed are means  $\pm$  S.E.M.

### Supplementary Fig. 3

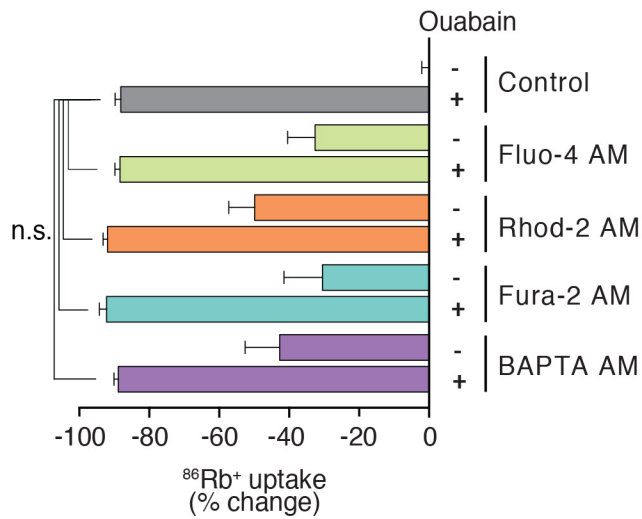

### Supplementary Fig.3. $\text{Ca}^{2+}$ indicators have no effect on ouabain-insensitive $^{86}\text{Rb}^+$ uptake

Cultured mouse astrocytes were loaded with Fluo-4 AM (10  $\mu\text{M}$ ), Rhod-2 AM (10  $\mu\text{M}$ ), Fura-2 AM (8  $\mu\text{M}$ ) and BAPTA AM (40  $\mu\text{M}$ ) with or without ouabain (1 mM), and  $^{86}\text{Rb}^+$  uptake was examined. Co-application of  $\text{Ca}^{2+}$  indicators and ouabain did not show further suppression in  $^{86}\text{Rb}^+$  uptake compared to single application of ouabain ( $n=4-15$  wells, one-way ANOVA followed by Tukey-Kramer test). Displayed are means  $\pm$  S.E.M.

## Supplementary Fig.4

**a**

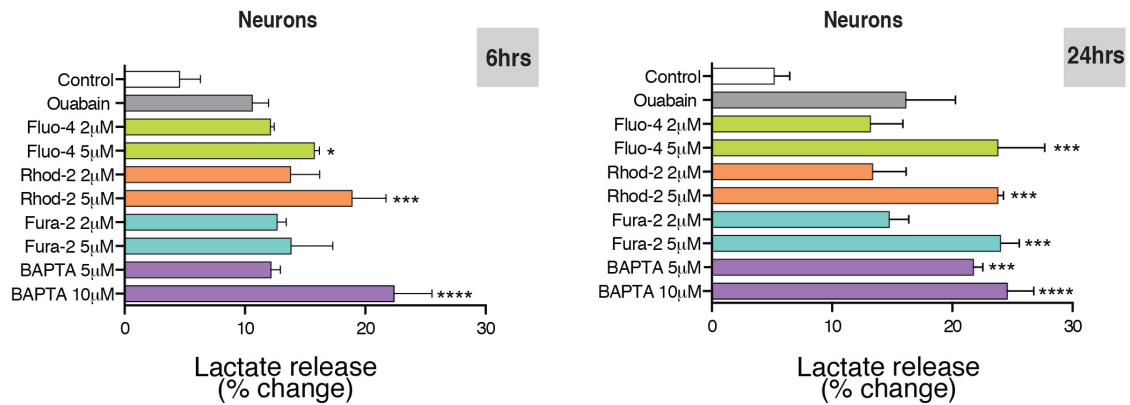

**b**

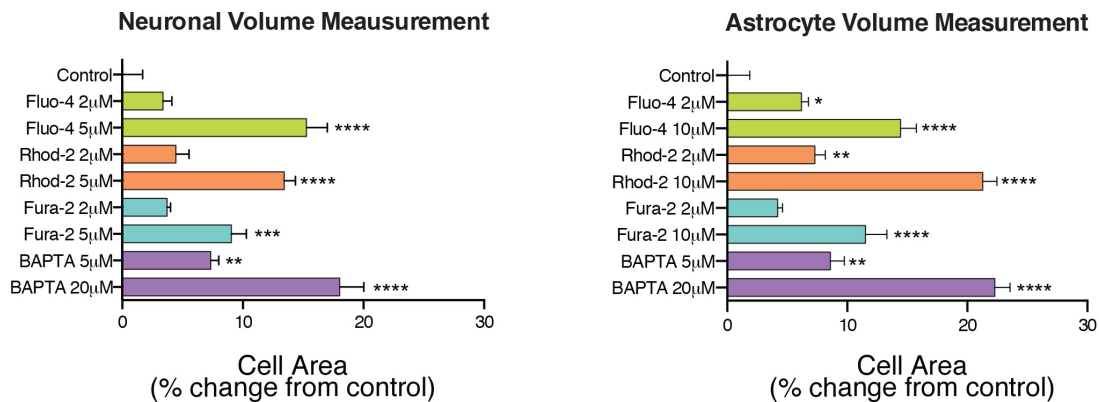

## Supplementary Fig.4. Ca<sup>2+</sup> indicators also induce Lactate Release in Neurons as well as Cell Volume in neurons and astrocytes

(a) Effects of Ca<sup>2+</sup> indicators (Fluo-4 AM, Rhod-2 AM and Fura-2 AM) or BAPTA AM on lactate release in cultured mouse neurons (n=5 wells; \*p<0.05, \*\*\*p<0.001, \*\*\*\*p<0.0001 compared to vehicle control (0.2% DMSO)). (b) Effects of Ca<sup>2+</sup> indicators (Fluo-4 AM, Rhod-2 AM and Fura-2 AM) or BAPTA AM on volume changes in cultured mouse neurons (n= 4, \*\*p<0.01, \*\*\*p<0.001, \*\*\*\*p<0.0001 compared to control group and astrocytes (n= 4 wells; \*p<0.05, \*\*p<0.01, \*\*\*p<0.001, \*\*\*\*p<0.0001 compared to control group. Displayed are means  $\pm$  S.E.M.

## Supplementary Fig. 5

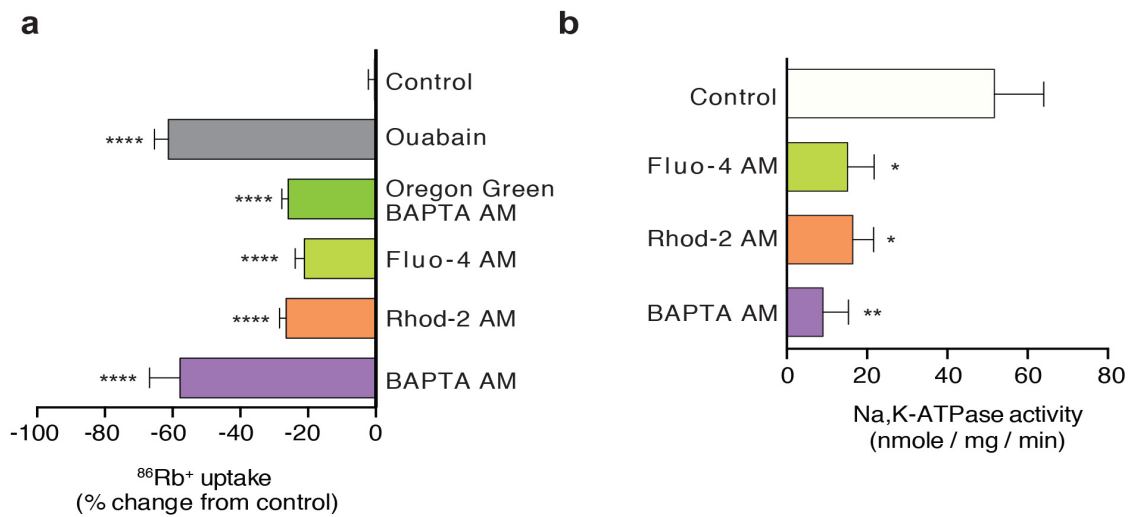

### Supplementary Fig.5. $\text{Ca}^{2+}$ indicators also inhibited Na,K-ATPase-mediated ATP hydrolysis and $^{86}\text{Rb}^+$ uptake in rat astrocyte cultures

(a) Effects of  $\text{Ca}^{2+}$  indicators (Oregon green 488 BAPTA-1 AM, 4.5  $\mu\text{M}$ ; Fluo-4 AM, 4.5  $\mu\text{M}$ ; Rhod-2 AM, 4.5  $\mu\text{M}$ ) and BAPTA AM (20  $\mu\text{M}$ ) on  $^{86}\text{Rb}^+$  uptake in rat cultured astrocytes ( $n = 4-23$  wells; \*\*\*\* $p < 0.01$  compared to control group). (b) Effects of  $\text{Ca}^{2+}$  indicators (Fluo-4 AM, 4.5  $\mu\text{M}$ ; Rhod-2 AM, 4.5  $\mu\text{M}$ ) and BAPTA AM (20  $\mu\text{M}$ ) on ouabain-sensitive ATP hydrolysis in membrane preparations derived from rat cultured astrocytes ( $n = 7-8$  wells; \* $p < 0.05$ , \*\* $p < 0.01$  compared to control group). Displayed are means  $\pm$  S.E.M. See also Supplementary Note 2.

**Supplementary Fig. 6**

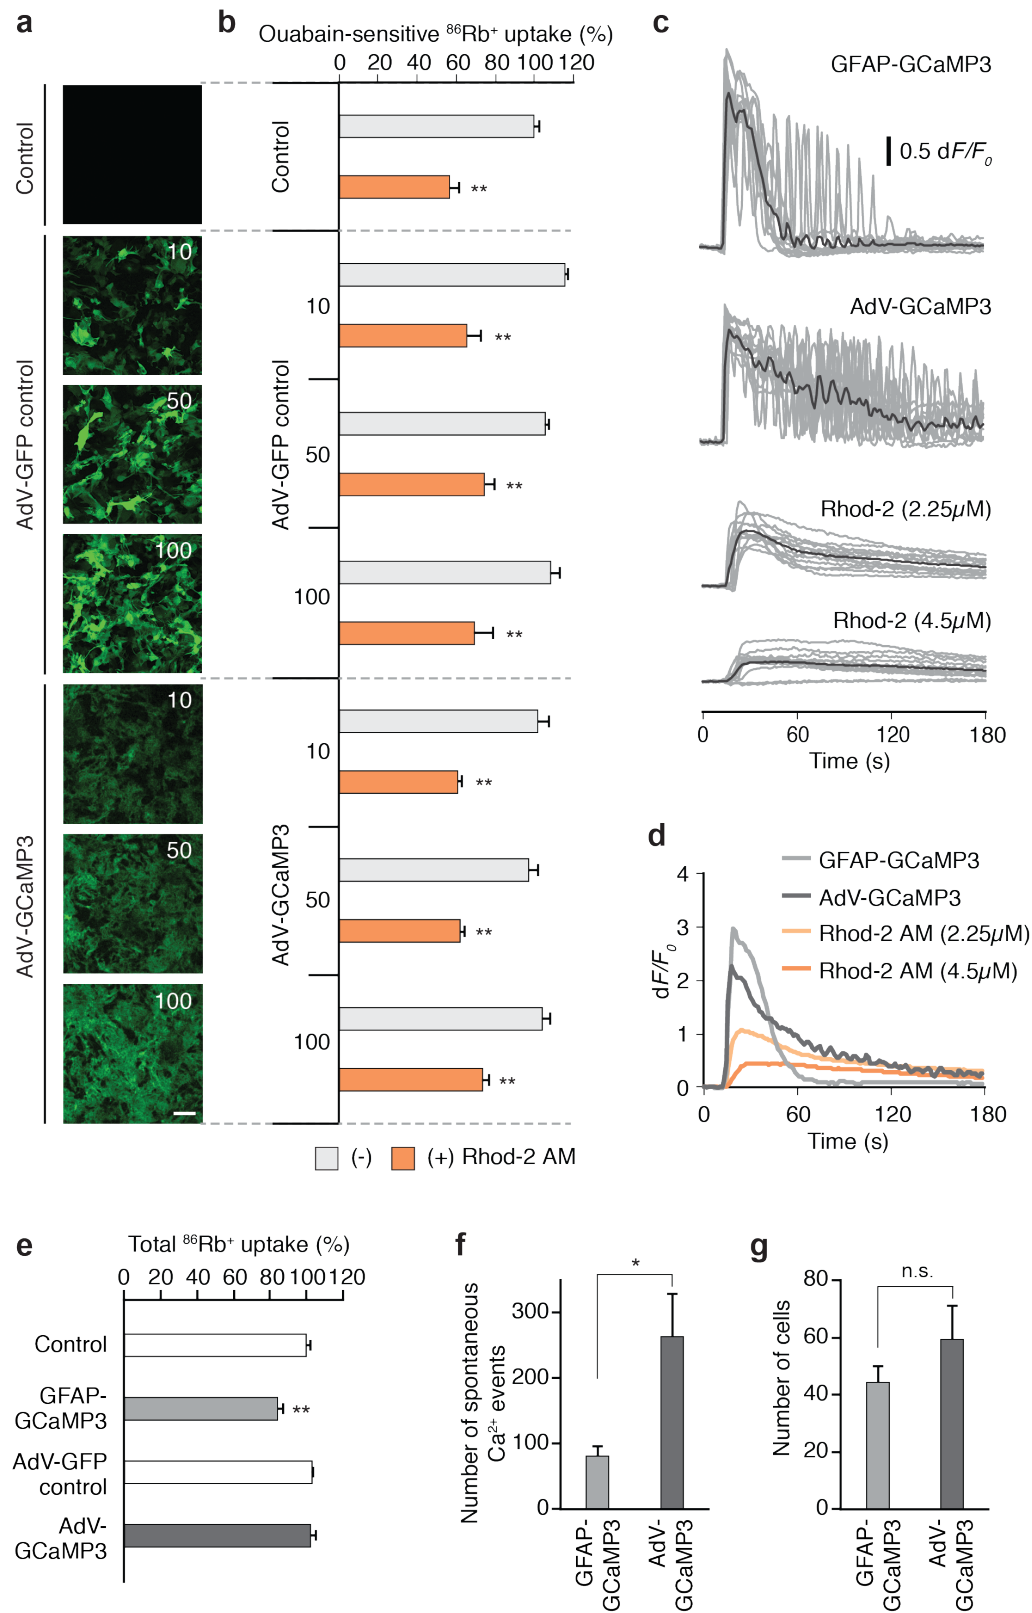

**Supplementary Fig.6. Quantification of spontaneous and pharmacologically evoked  $\text{Ca}^{2+}$  signals and  $^{86}\text{Rb}^{+}$  uptake in GCaMP3-expressing astrocytes**

(a) Representative images of astrocytes expressing GCaMP3 or GFP. Astrocytes prepared from GCaMP3fl transgenic mice were infected with Cre recombinase-adenovirus with 10, 50 or 100 MOI to induce GCaMP3 expression (AdV-GCaMP3). As control, astrocytes infected with GFP-adenovirus were used (AdV-GFP control). Scale bar, 100  $\mu\text{m}$ . (b) Induction of GCaMP3 expression in astrocytes had no effect on Na,K-ATPase-mediated  $^{86}\text{Rb}^{+}$  uptake, whereas Rhod-2 AM loading (4  $\mu\text{M}$ ) consistently induced the decrease in all cell types.  $**p < 0.01$  compared to (-) Rhod-2 AM group in control culture. (c) Representative individual traces of  $\text{Ca}^{2+}$  transients from 12 astrocytes (grey) and averages (black) showing GFAP-GCaMP3, AdV-GCaMP3 or Rhod-2 responses to application of 5  $\mu\text{M}$  ATP. In AdV-GCaMP3 astrocytes, long-lasting rhythmic oscillations in  $\text{Ca}^{2+}$  responses were observed. GFAP-GCaMP3 astrocytes exhibited shorter (~60 s) oscillations (10 out of 12 cells) in all but 2 astrocytes that exhibited comparatively longer (~120 s) oscillations. In contrast, Rhod-2 AM (2.25 and 4.5  $\mu\text{M}$ ) loaded cells failed to exhibit similar oscillatory patterns, instead showing only small fluctuating  $\text{Ca}^{2+}$  signals. (d) Representative averaged traces of  $\text{Ca}^{2+}$  transients evoked by 5  $\mu\text{M}$  ATP in astrocytes measured by Rhod-2 AM or GCaMP3 (GFAP-GCaMP3 or AdV-GCaMP3, 100 MOI). GFAP-GCaMP3 and AdV-GCaMP3 showed high  $dF/F_0$  compared to Rhod-2 ( $n=75$  each). (e) Total  $^{86}\text{Rb}^{+}$  uptake was slightly but significantly decreased in GFAP-GCaMP3 astrocytes. No difference in total  $^{86}\text{Rb}^{+}$  uptake was observed in AdV-GFP or AdV-GCaMP3 astrocytes (100 MOI each).  $**p < 0.01$  compared to control. (f and g) Number of events (f) or cells (g) showing spontaneous  $\text{Ca}^{2+}$  rise during 5 min in GFAP-GCaMP3 or AdV-GCaMP3 expressing astrocytes. Significantly higher number of spontaneous  $\text{Ca}^{2+}$  events was observed in AdV-GCaMP3 group, but number of cells showing  $\text{Ca}^{2+}$  rise was similar in GFAP-GCaMP3 and AdV-GCaMP3 groups.  $*p < 0.05$  compared to GFAP-GCaMP3 group. Displayed are means  $\pm$  S.E.M. See also Supplementary Note 3.

## Supplementary Movies

**Supplementary Movie 1. Beating cardiomyocytes in culture prepared from mouse (2x framerate)**

**Supplementary Movie 2. ATP-induced  $\text{Ca}^{2+}$  response in astrocytes expressing GFAP-GCaMP3**

**Supplementary Movie 3. ATP-induced  $\text{Ca}^{2+}$  response in astrocytes expressing Adv-GCaMP3**

**Supplementary Movie 4. ATP-induced  $\text{Ca}^{2+}$  response in astrocytes loaded with Rhod-2 AM**

**Supplementary Movie 5. Spontaneous  $\text{Ca}^{2+}$  response in astrocytes expressing GFAP-GCaMP3**

## Supplementary Notes

**Supplementary Note 1. Structures and characters of  $\text{Ca}^{2+}$  indicator derivatives used for published papers listed in PubMed**

The initial  $\text{Ca}^{2+}$  indicator, 1,2-bis(o-aminophenoxy)ethane-N,N,N',N'-tetraacetic acid (BAPTA), was first introduced in 1979. Many different types of  $\text{Ca}^{2+}$  indicator dyes, including Fluo-4, Rhod-2 and Fura-2, have been created, and analysis of papers listed in PubMed revealed that more than 25,600 papers using  $\text{Ca}^{2+}$  indicators have been published (**Supplementary Fig. 1a**). The summary for concentrations of  $\text{Ca}^{2+}$  indicator dyes used in the recently published papers (Fluo-4 AM, 2014-2015; Rhod-2 AM, 2013-2015). Several papers that could not be obtained or are written in Chinese or Ukrainian were not included.  $\text{Ca}^{2+}$  indicator dyes have similar molecular weight and share their structures (**Supplementary Fig. 1b and c**). Fura-2 has high affinity for  $\text{Ca}^{2+}$  compared to Fluo-4 and Rhod-2 (**Supplementary Fig. 1b**). Despite widespread use of  $\text{Ca}^{2+}$  indicator dyes, only little attention has been paid to their side-effects. A few reports have, however, shown that  $\text{Ca}^{2+}$  indicators can alter cellular functions, such as  $\text{Ca}^{2+}$ -induced  $\text{Ca}^{2+}$  release from endoplasmic reticulum in cerebellar granule neurons and HEK-293 cells <sup>1</sup>, field excitatory postsynaptic potentials in the brain hippocampal slice <sup>2</sup>,  $\text{K}^+$  channels genetically expressed in HEK293 cells <sup>3</sup>, and  $\text{K}^+$  currents in brain slices <sup>4</sup>.

**Supplementary Note 2.  $\text{Ca}^{2+}$  indicators inhibit Na,K-ATPase activity in rat astrocyte cultures**

To broaden our findings, we also prepared astrocyte cultures from rats, which are another rodent species in which calcium indicators are widely used in basic research. As expected,  $^{86}\text{Rb}^+$  uptake was suppressed by Fluo-4, Rhod-2 and BAPTA AM loading (**Supplementary Fig. 5a**). Consistently, ATP hydrolysis mediated by Na,K-ATPase was suppressed by loading of Fluo-4, Rhod-2 and BAPTA AM (**Supplementary Fig. 5b**). We also examined the effect of other  $\text{Ca}^{2+}$  indicator, Oregon green BAPTA AM, and found the comparable inhibition of  $^{86}\text{Rb}^+$  uptake to other  $\text{Ca}^{2+}$  indicators (**Supplementary Fig. 5a**).

### Supplementary Note 3. Quantification of spontaneous and pharmacologically evoked $\text{Ca}^{2+}$ signals and $^{86}\text{Rb}^{+}$ uptake in GCaMP3-expressing astrocytes

Astrocytes expressing GCaMP3 (AdV-GCaMP3) or GFP (AdV-GFP control) showed no difference in Na,K-ATPase-mediated  $^{86}\text{Rb}^{+}$  uptake. Conversely, Rhod-2 AM loading (4  $\mu\text{M}$ ) consistently induced the decrease in all cell types (**Supplementary Fig. 6a,b**). Analysis of  $\text{Ca}^{2+}$  transients in response to application of 5  $\mu\text{M}$  ATP revealed that AdV-GCaMP3 astrocytes exhibit long-lasting pattern of rhythmic oscillations. GFAP-GCaMP3 astrocytes also exhibited both shorter (~60 s) and longer (~120 s) pattern of oscillation, whereas Rhod-2 AM (2.25 and 4.5  $\mu\text{M}$ ) loaded cells had no oscillation but with small, fluctuated  $\text{Ca}^{2+}$  signals (**Supplementary Fig. 6c,d**). For this set of experiment, we employed lower concentration of ATP (5  $\mu\text{M}$ ). GCaMP3 showed larger response than Rhod-2, suggesting that GCaMP3 can clearly detect intracellular  $\text{Ca}^{2+}$  changes triggered by low dose of GPCR agonists.

### Supplementary References

- 1 Alonso, M. T., Chamero, P., Villalobos, C. & Garcia-Sancho, J. Fura-2 antagonises calcium-induced calcium release. *Cell calcium* 33, 27-35 (2003).
- 2 Ouanounou, A. *et al.* Accumulation and extrusion of permeant  $\text{Ca}^{2+}$  chelators in attenuation of synaptic transmission at hippocampal CA1 neurons. *Neuroscience* 75, 99-109 (1996).
- 3 Tang, Q. *et al.* The membrane permeable calcium chelator BAPTA-AM directly blocks human ether a-go-go-related gene potassium channels stably expressed in HEK 293 cells. *Biochem Pharmacol* 74, 1596-1607, doi:10.1016/j.bcp.2007.07.042 (2007).
- 4 Zhang, L. *et al.* Potentiation of a slow  $\text{Ca}^{2+}$ -dependent  $\text{K}^{+}$  current by intracellular  $\text{Ca}^{2+}$  chelators in hippocampal CA1 neurons of rat brain slices. *J Neurophysiol* 74, 2225-2241 (1995).
